# Supplementary material for: Development of human cartilage circadian rhythm in a stem cell-chondrogenesis model
Source: PubMed Central journal article supplement (PMC9131279; doi:10.7150/thno.70893), 2022-05-13
Supplement: thnov12p3963s1.pdf [file thnov12p3963s1.pdf]

## **Development of human cartilage circadian rhythm in a stem cell-chondrogenesis model**

Mark A Naven<sup>1,2</sup>, Leo A.H. Zeef<sup>3</sup>, Shiyang Li<sup>1,2</sup>, Paul A Humphreys<sup>2</sup>, Christopher A Smith<sup>2</sup>, Dharshika Pathiranage<sup>2</sup>, Stuart Cain<sup>2</sup>, Steven Woods<sup>2</sup>, Nicola Bates<sup>2</sup>, Manting Au<sup>4</sup>, Chunyi Wen<sup>4</sup>, \*Susan J Kimber<sup>2</sup> and \*Qing-Jun Meng<sup>1,2</sup>

### **Supplementary figure legends:**

**Fig. S1. Vector maps of new Lentiviral clock gene reporter constructs (*hBMAL1-Luc* and *hPER2-Luc*) containing a GFP sequence after a T2A linker.**

### **Figure S2. Histological staining of human cartilage as controls.**

Human cartilage sections were cut to 5  $\mu\text{m}$  and subjected to histological stains. The stains shown are representative examples of N = 3 patients. Scale bar = 50  $\mu\text{m}$ . **(A)**. Haematoxylin and Eosin Staining. **(B)**. Safranin O staining. The representative images were from a 68 years old female knee osteoarthritis patient.

### **Fig. S3. Evaluation of clock gene reporters in the TC28a human chondrocyte cell line.**

**(A)**. Colony selection schematic. Cells were transduced and then a preliminary selection was run to enrich a polyclonal population of low GFP intensity. A second sort was carried out by seeding single cells into individual wells of 96 well plates. These were expanded for up to 3 months until sufficient cell numbers were obtained. The cells were then split from 96 well plates into T25 flasks and further cultured. The colonies were screened: cells that exhibited minimal changes to morphology and exhibited good circadian reporter rhythm were expanded and cryopreserved. **(B)**. Representative fluorescence microscopy image of FACS sorted cells to confirm GFP expression and assess morphology. Cells can be cultured in 3D. Scale bars = 100  $\mu\text{m}$ .

**(C)**. Representative bioluminescence traces of colonies of TC28a cells stably transduced with lentiviral clock reporters.

**(D).** Normalised data based on C), highlighting the antiphase oscillations of *hBMAL1*-Luc and *hPER2*-Luc reporters in TC28a2 cells (N = 3).

**Fig. S4. Validation of antibodies for PER2 and BMAL1 in a human chondrosarcoma SW1353 cell line.**

The size of PER2 is expected to be > 200 kDa (upper arrow), while the smaller band under 150 kDa is likely the unphosphorylated form of PER2 (lower arrow). The expected size of BMAL1 is 69 kDa.

**Fig. S5. Verification of the expression of CLOCK proteins in MAN13 stem cells during chondrogenic differentiation.**

Whole cell lysates were collected from MAN13 hESCs on days 0, 4, 8 and 11 of the RAPID protocol. Proteins were separated by molecular weight using bis-tris 10% gels and detected with anti-CLOCK and anti-alpha tubulin primary antibodies followed by GFP- and RFP- labelled secondary antibodies (LI-COR), respectively. Membranes were analysed on LI-COR Odyssey CLx using ImageStudio v4.2 Software.

**Fig. S6. Genome-wide changes of gene expression during RAPID differentiation of MAN13 hESCs.**

**(A).** Principal Component Analysis (PCA) of RNAseq data showing separation of the three groups at different developmental stages (time points). **(B).** Heatmap of the top 50 genes that showed most significant variations among the three groups revealed by differential expression analysis. Samples were clustered according to developmental stages indicated by the bar at top of the graph. The graph shows N = 3 (for Day 11 and Day 21) or N = 4 (for pluripotent cells) with replicates in sequential order.

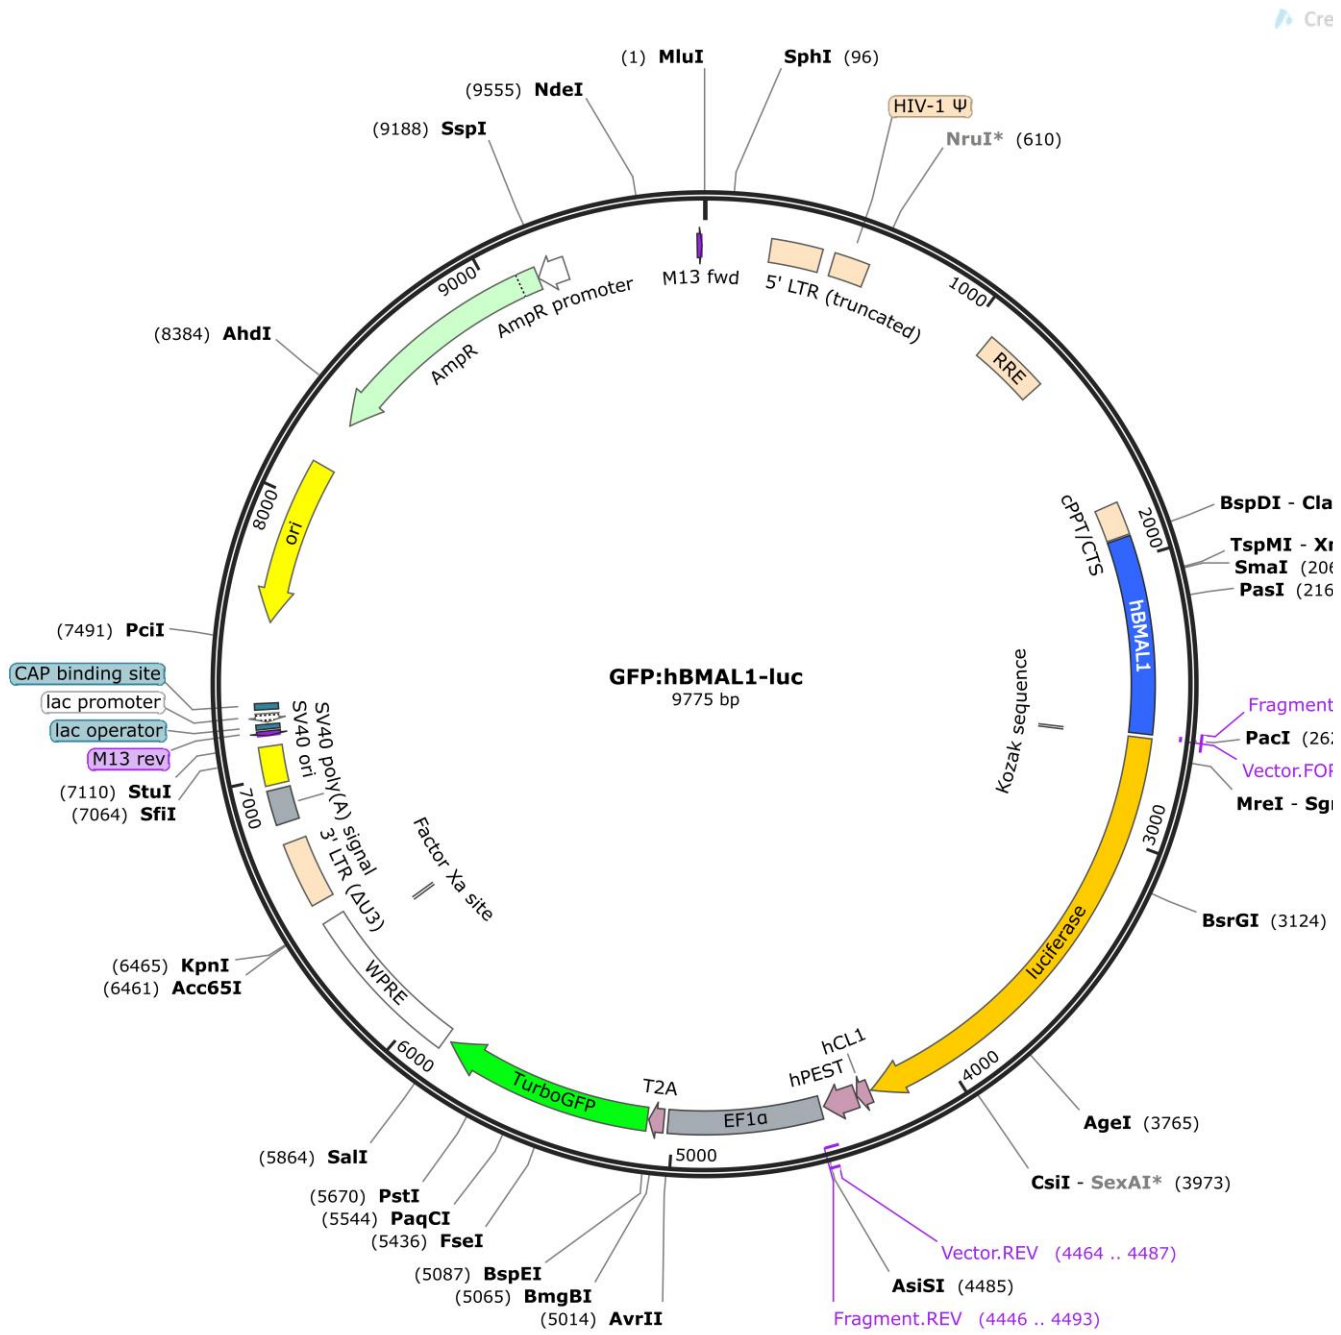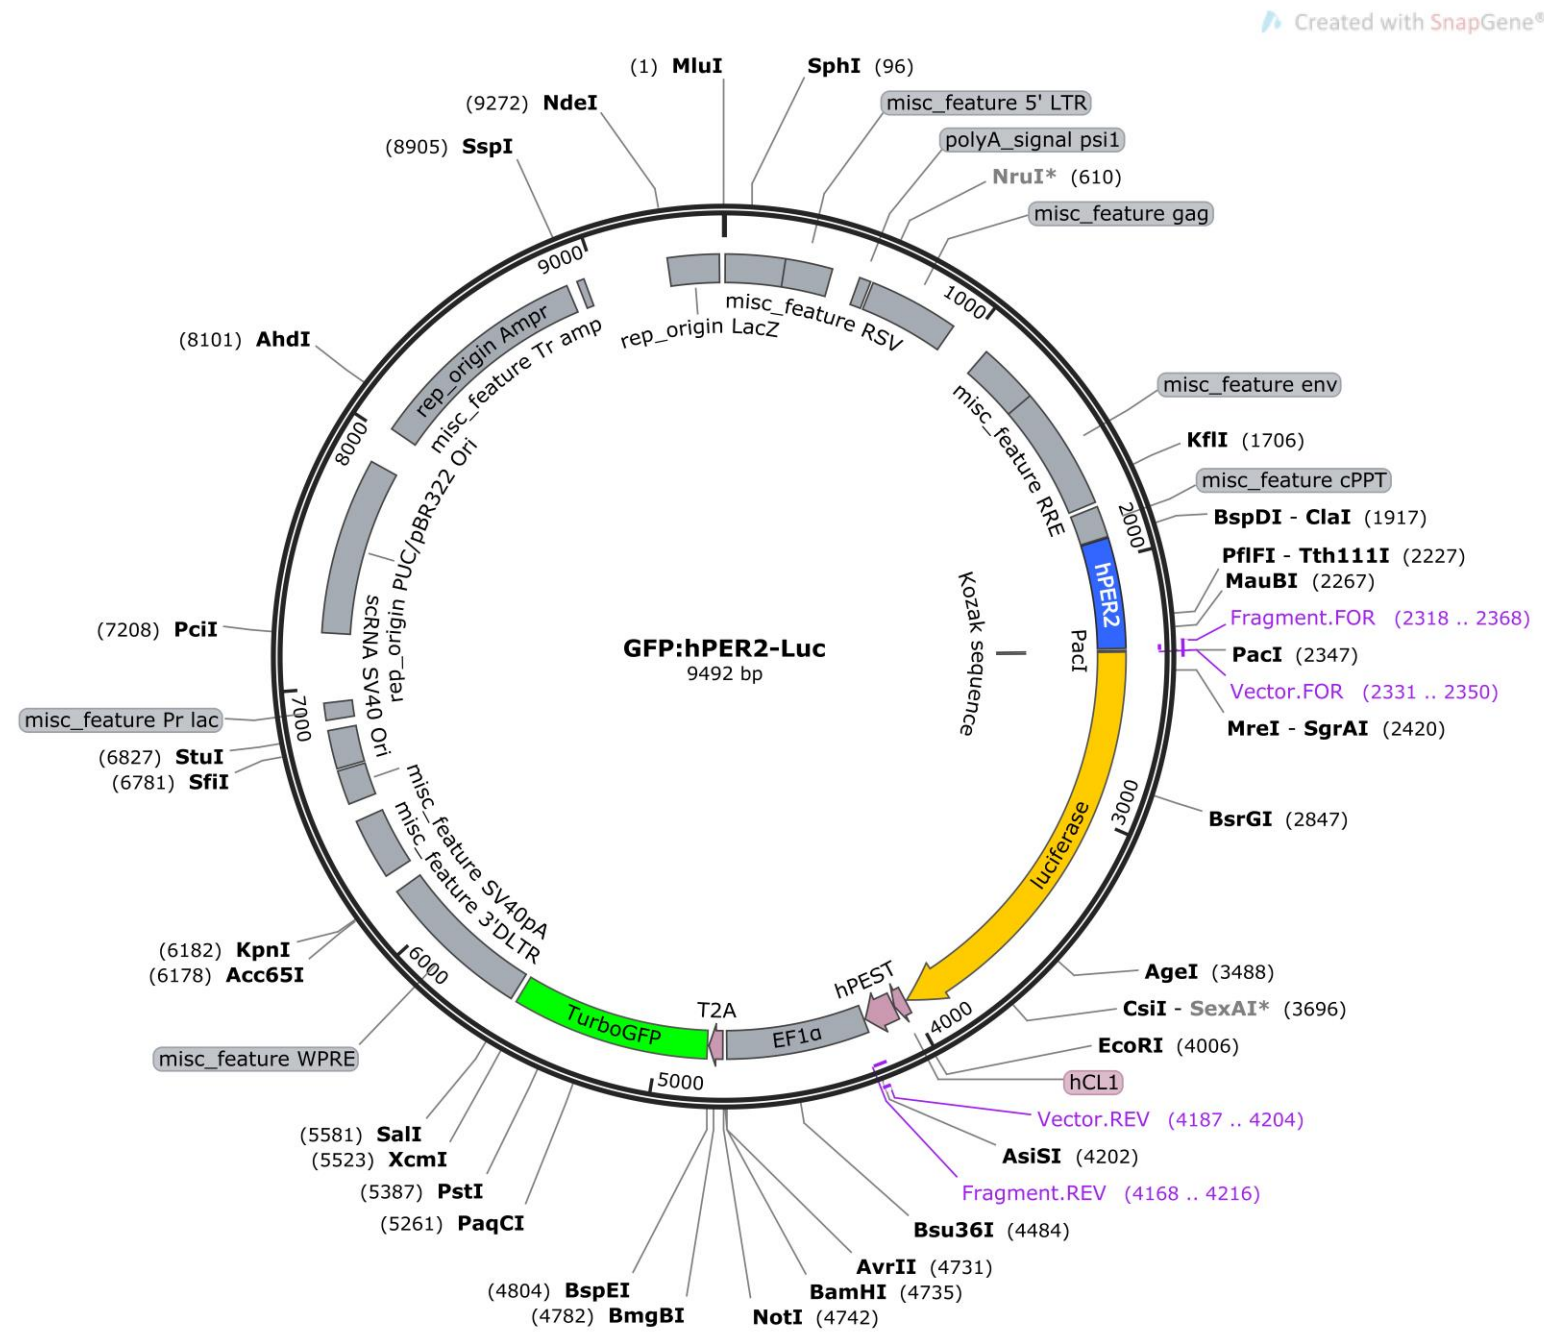

Figure S1

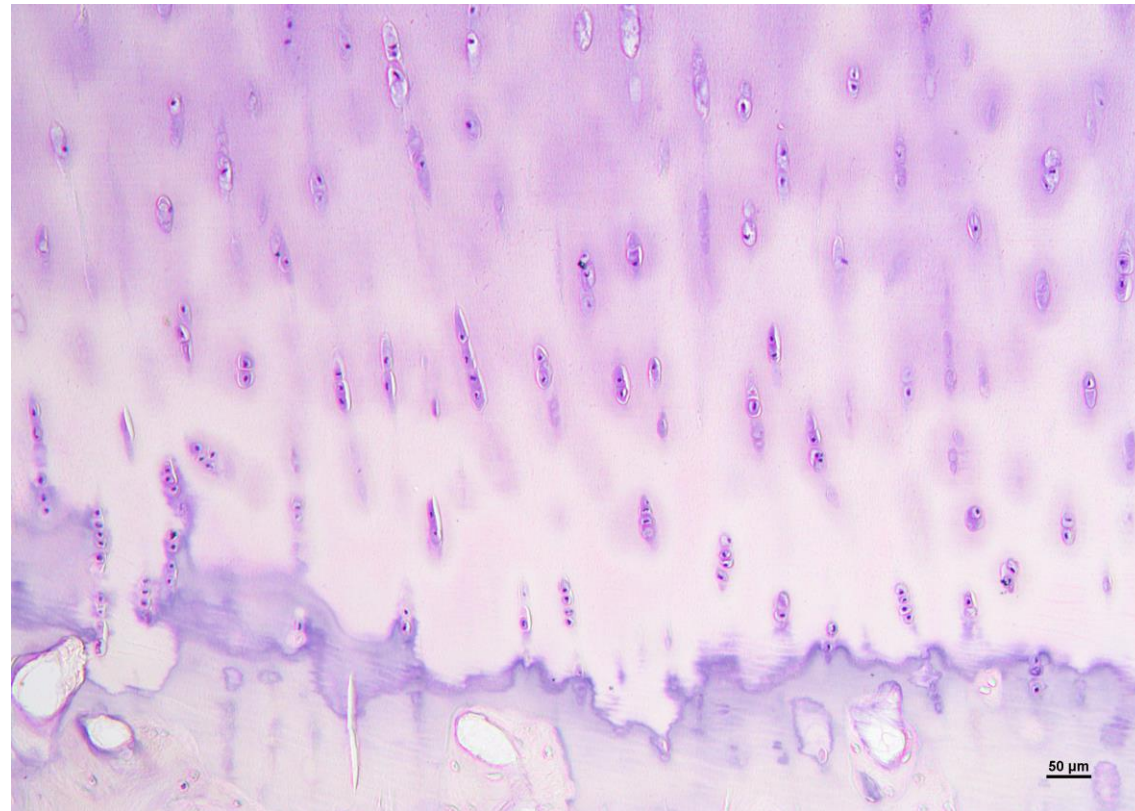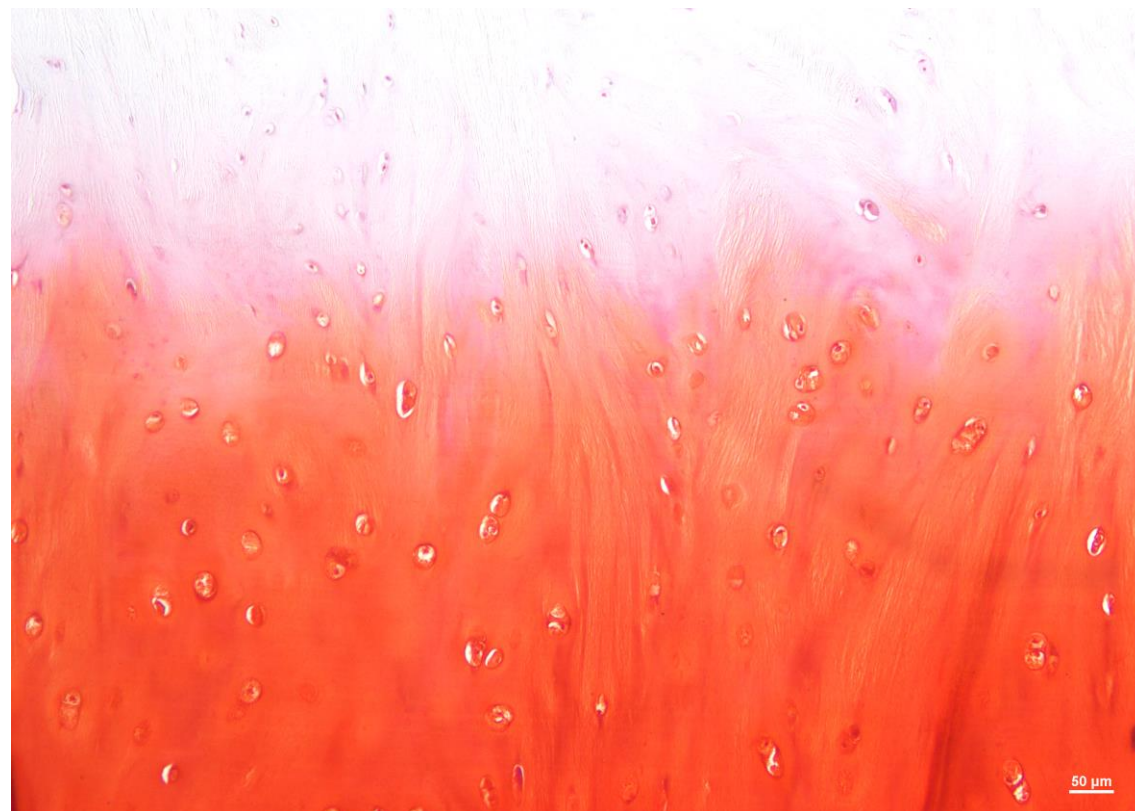

Figure S2

**A**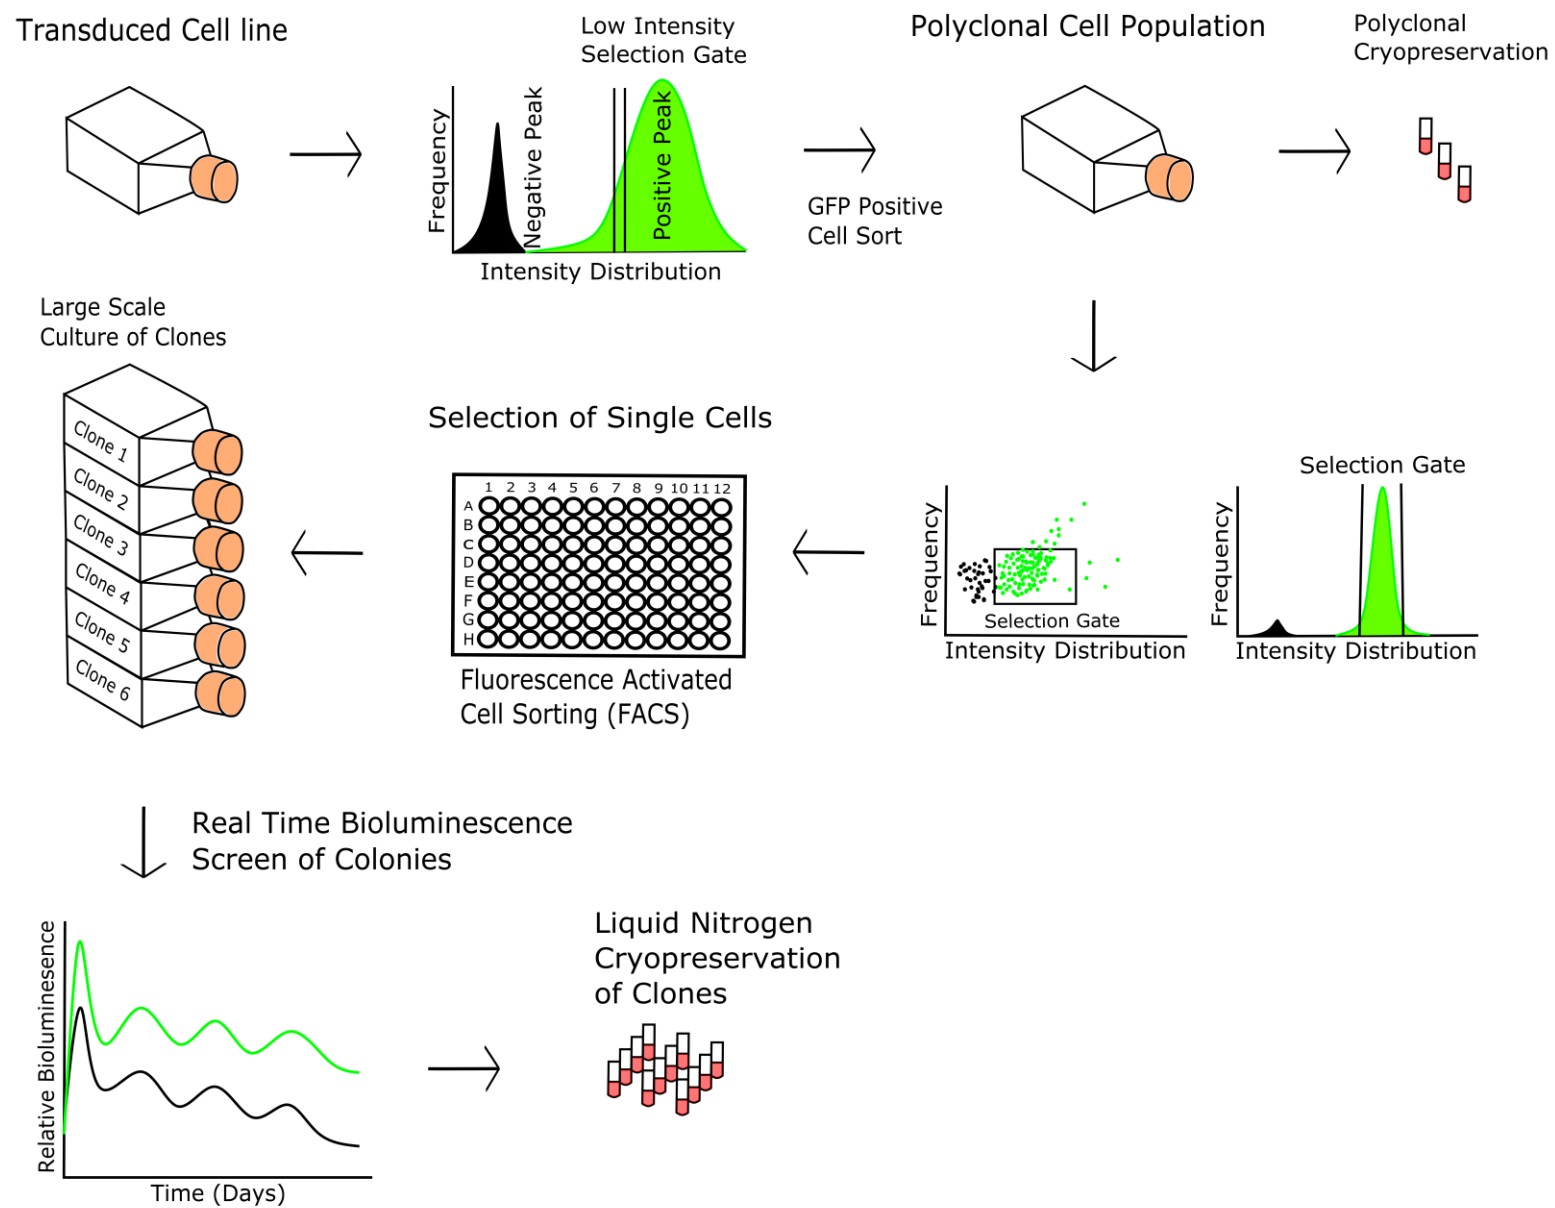**B**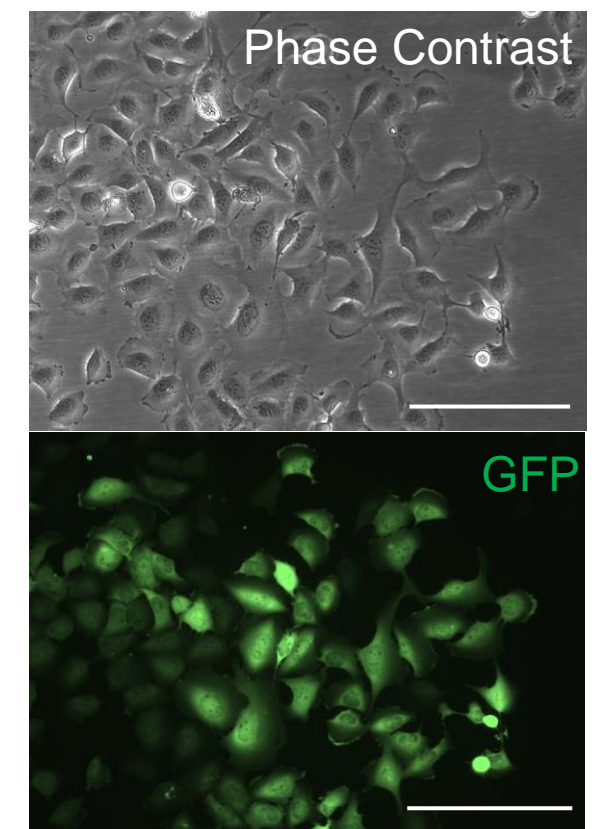**C**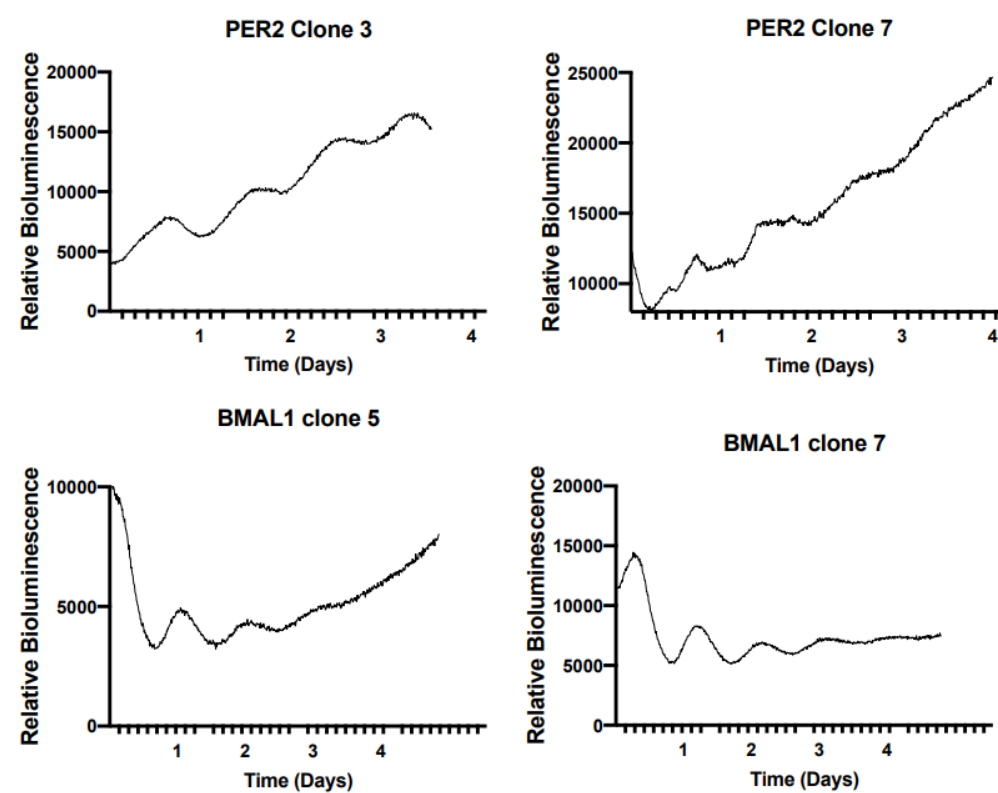**D**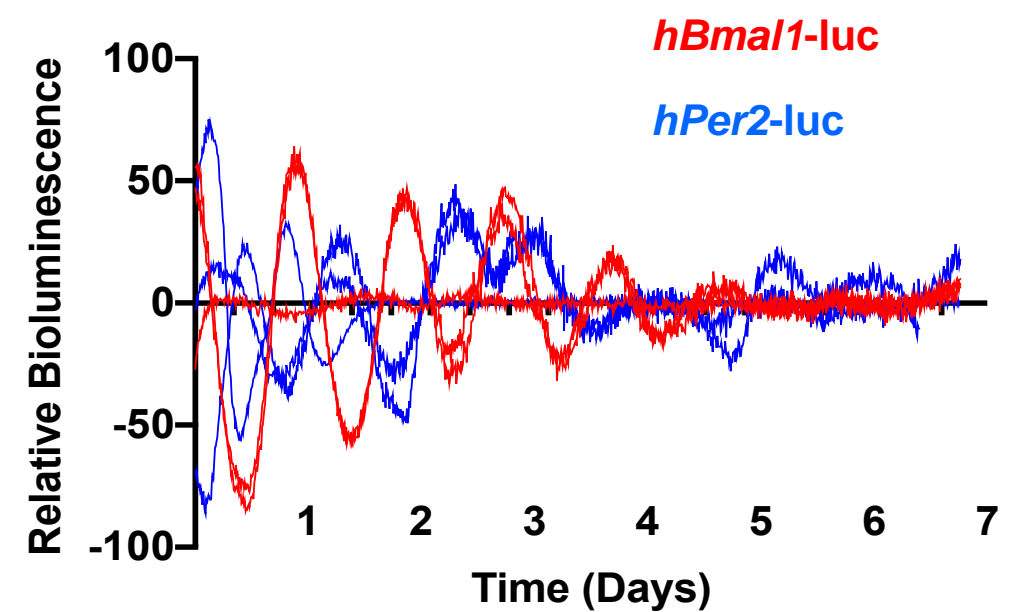

Figure S3

Millipore anti-PER2 (1:1000)

Millipore anti-BMAL1 (1:1000)

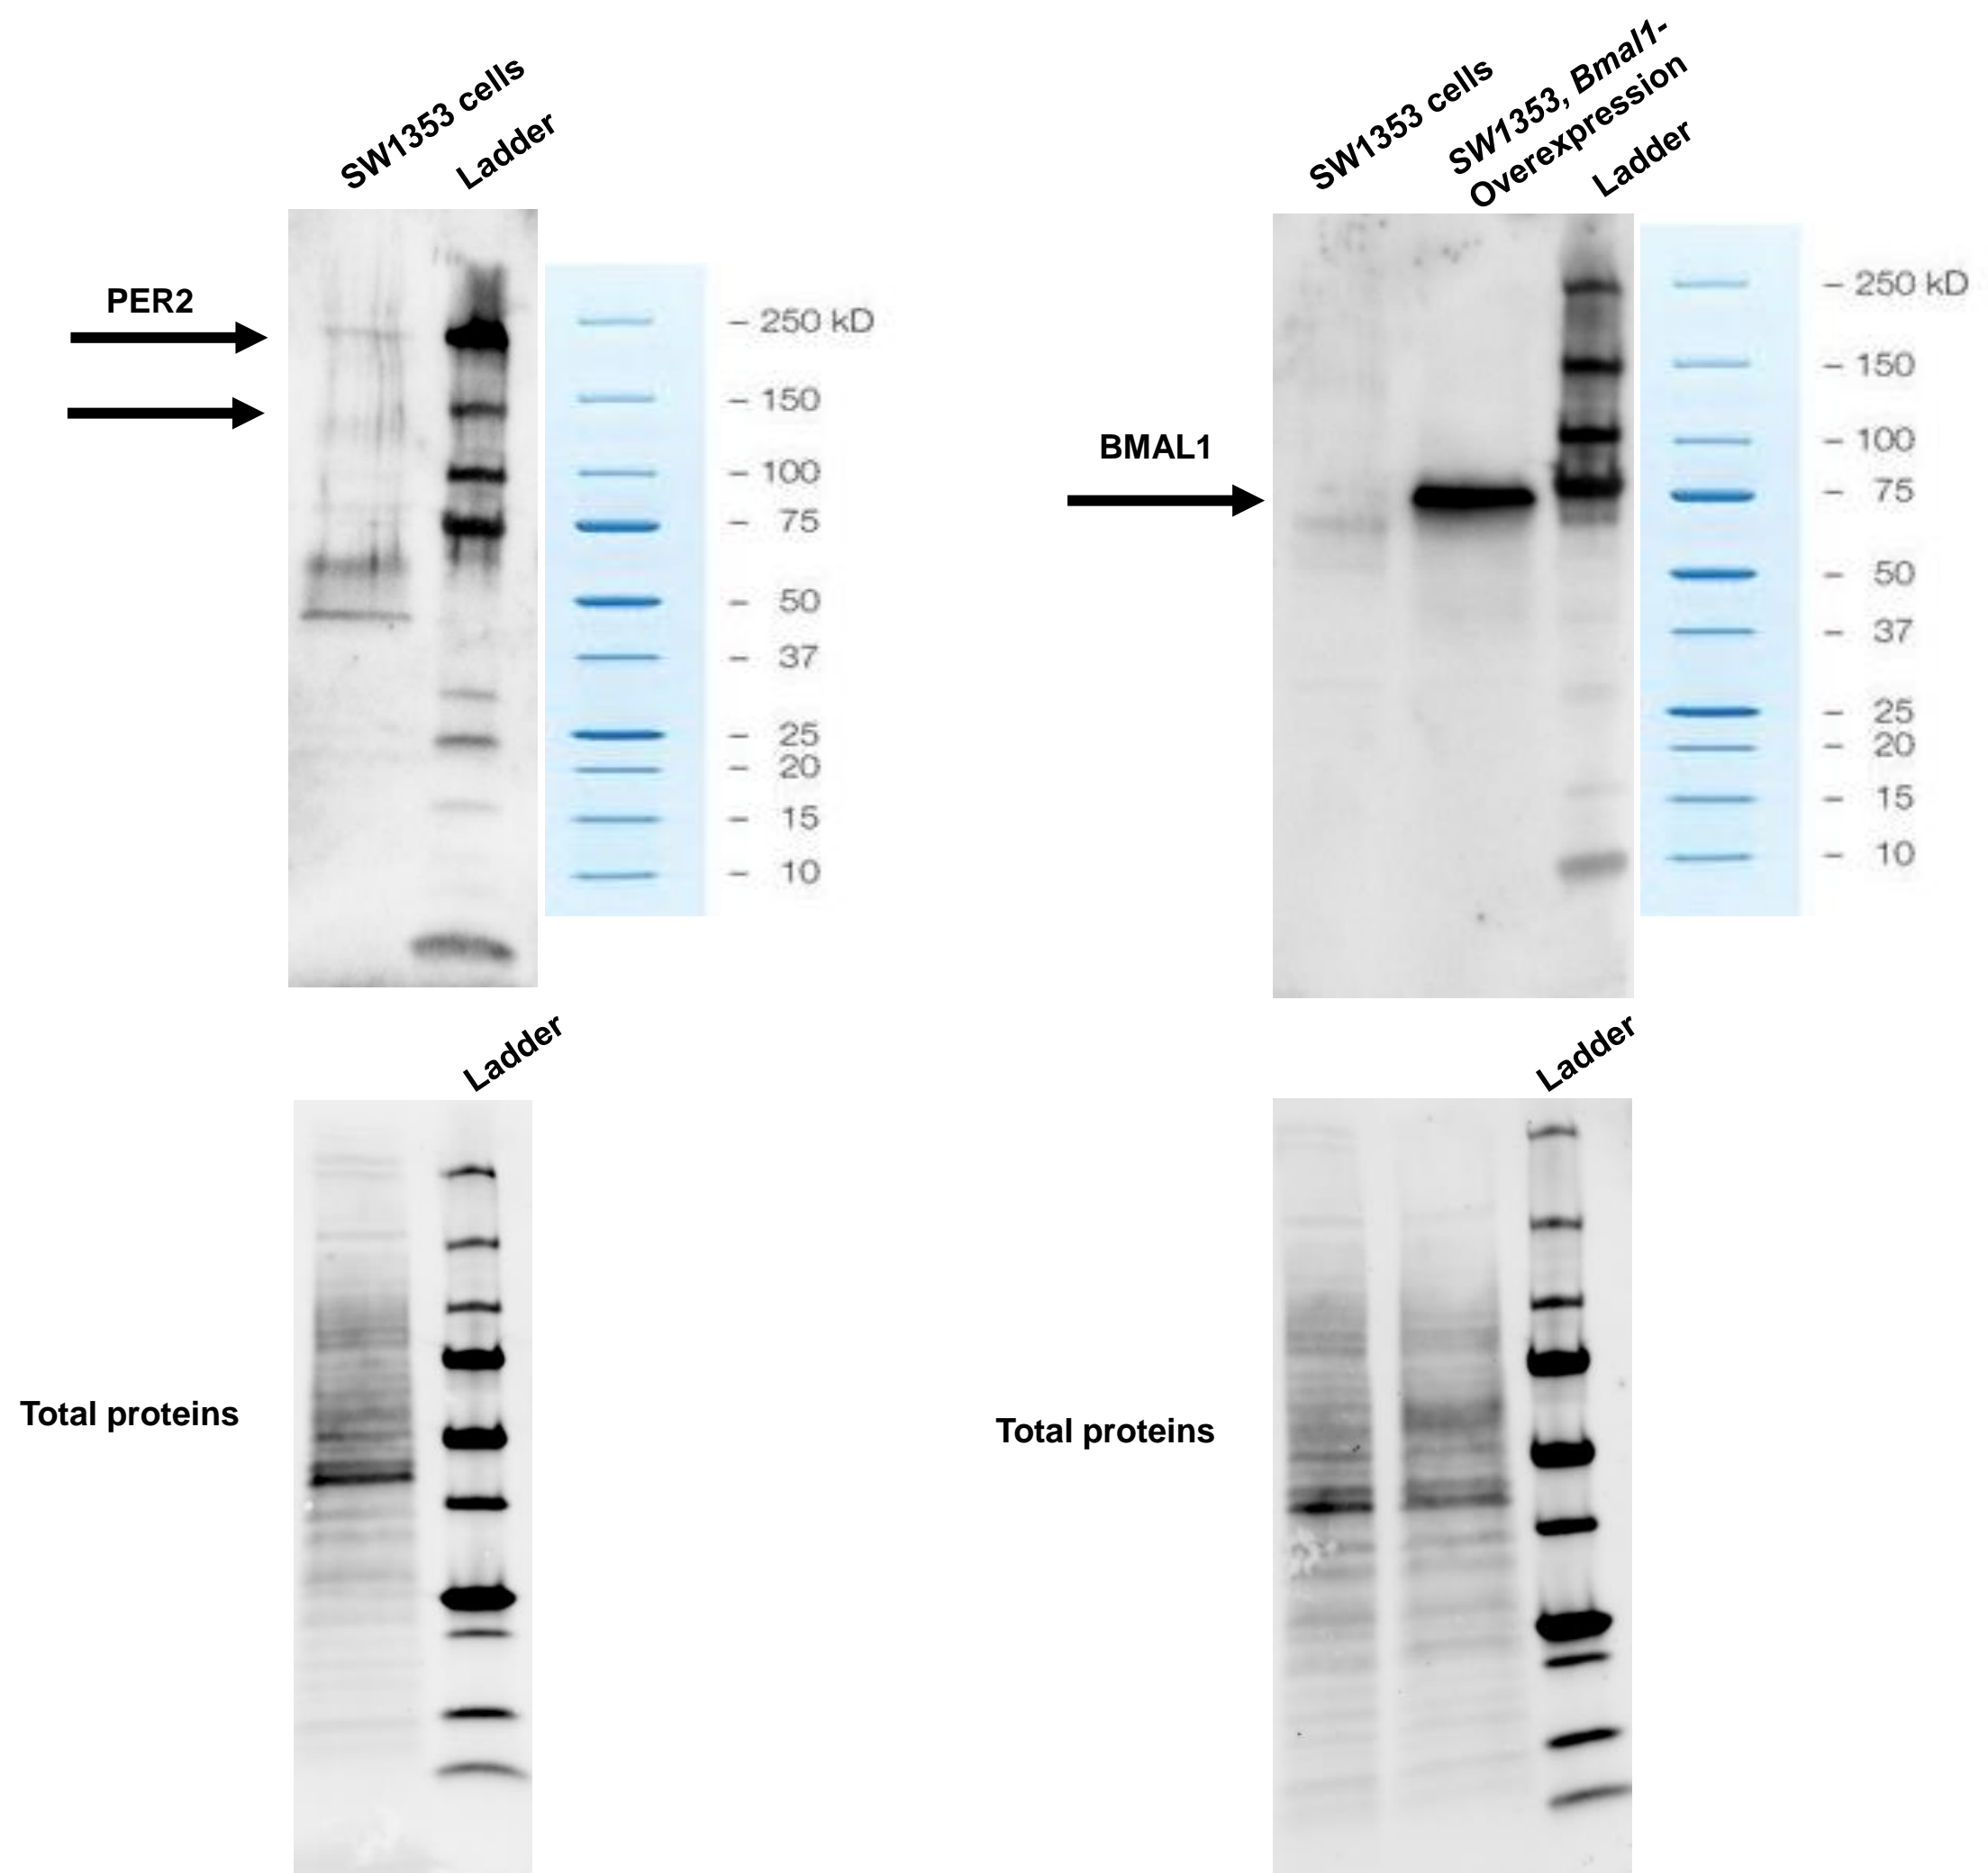

Figure S4

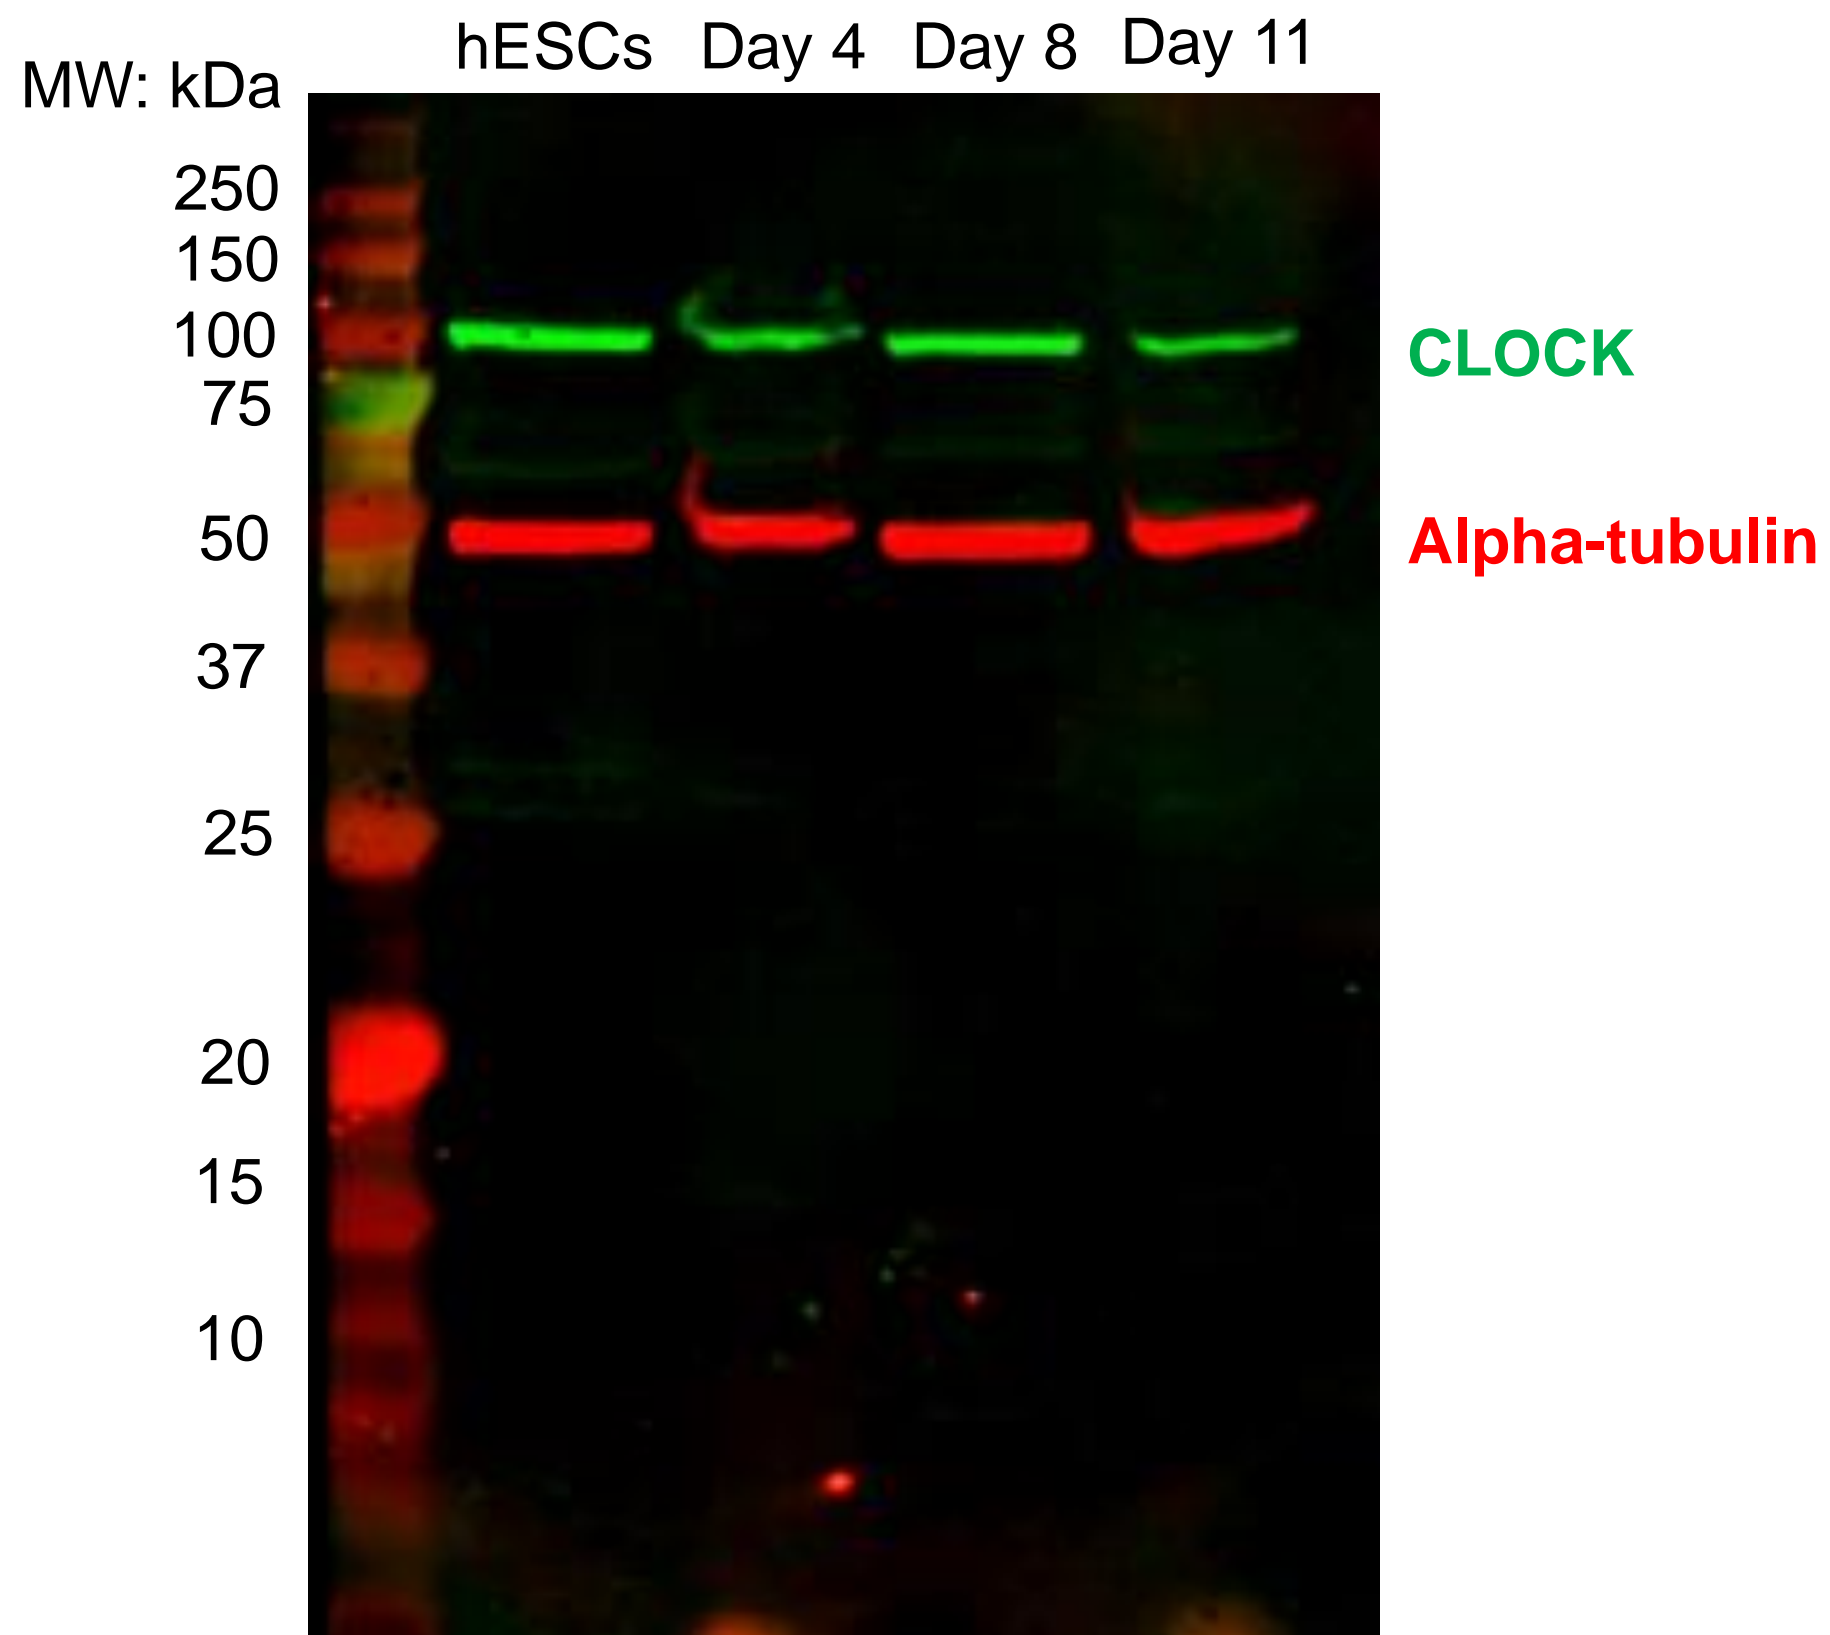

Figure S5

**A**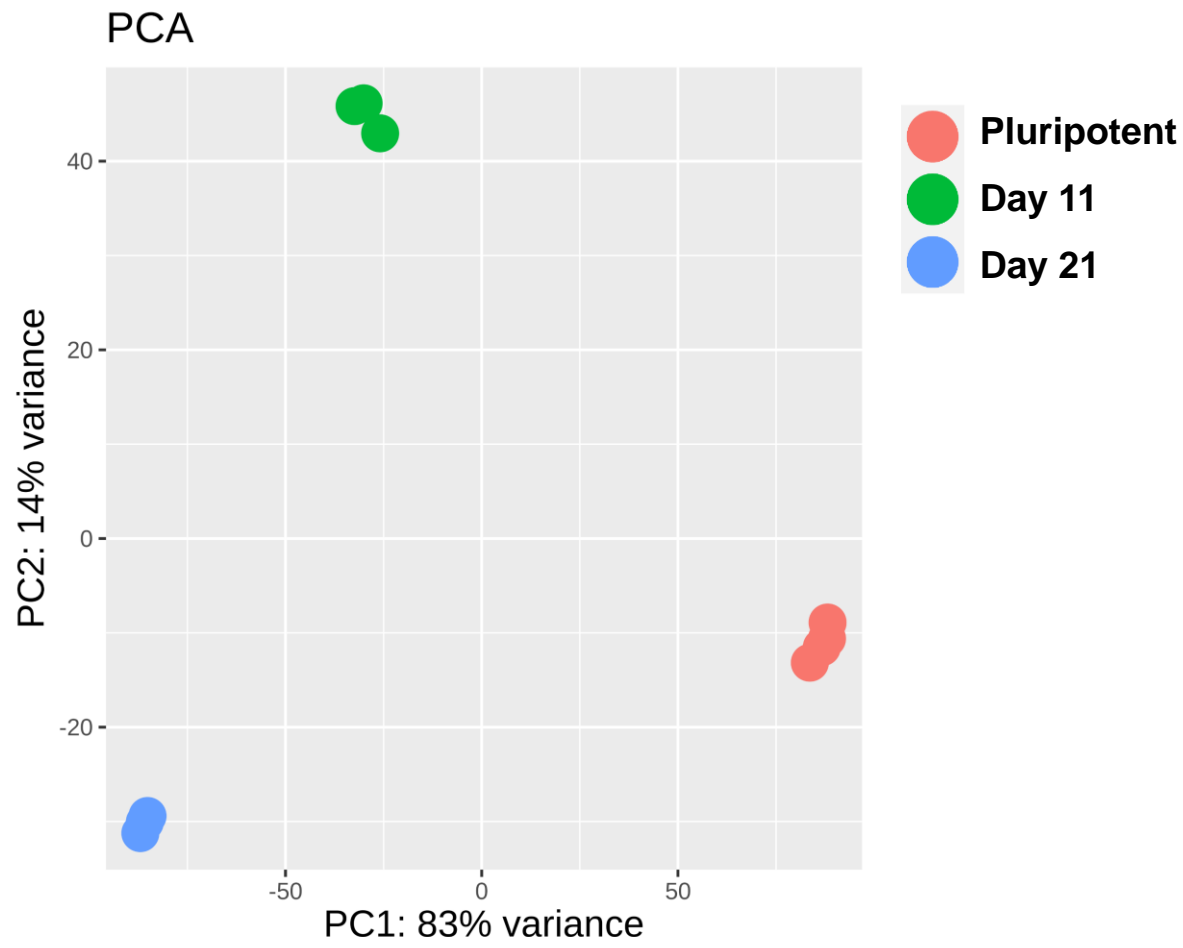**B**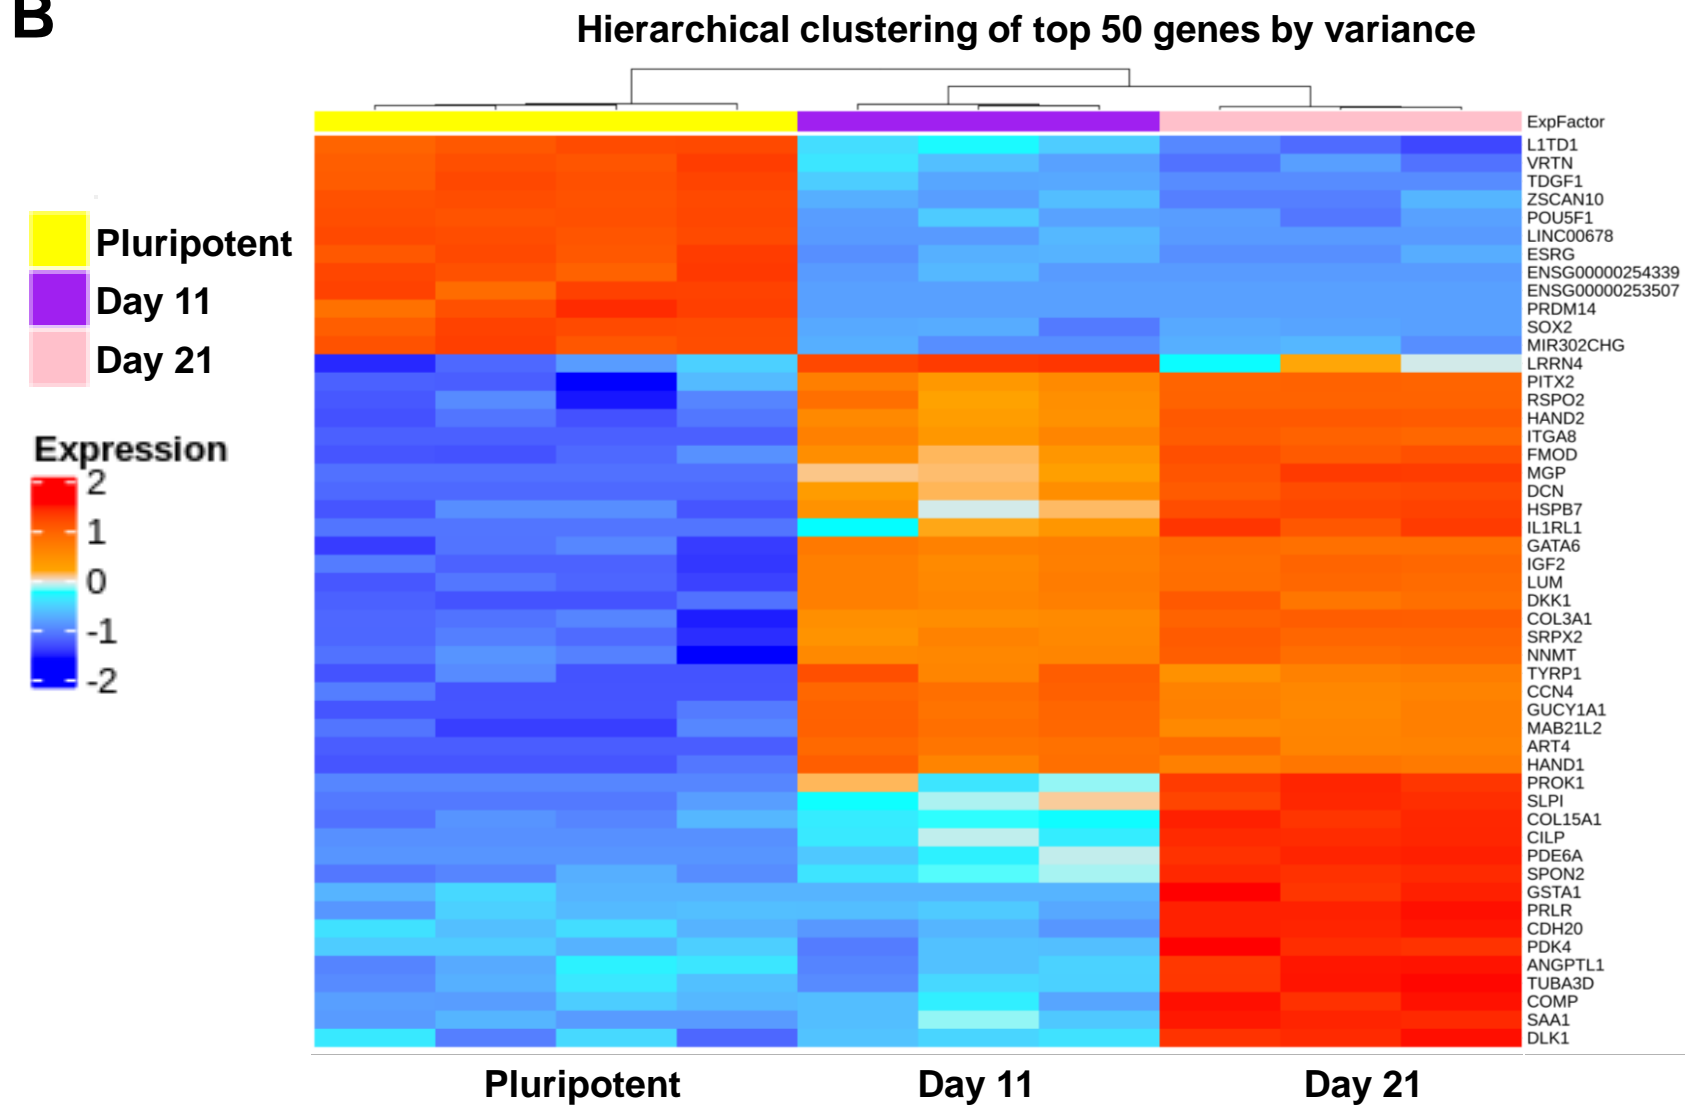

Figure S6
